# Supplementary material
Source: HighWire-hosted journal article supplement (https://www.cmaj.ca/highwire/filestream/58949/field_highwire_adjunct_files/0/Appendix_1.pdf)
Supplement: Appendix_1.pdf [file Appendix_1.pdf]

## References to “Five things to know about Synthetic cannabinoids”

1. Seely KA, Lapoint J, Moran JH, et al. Spice drugs are more than harmless herbal blends: a review of the pharmacology and toxicology of synthetic cannabinoids. *Prog Neuropsychopharmacol Biol Psychiatry* 2012;39:234-43.
2. Castellanos D, Thornton G. Synthetic cannabinoid use: recognition and management. *J Psychiatr Pract* 2012;18:86-93.
3. Vandrey R, Dunn KE, Fry JA, et al. A survey study to characterize use of spice products (synthetic cannabinoids). *Drug Alcohol Depend* 2012;120:238-41.
4. Jerry J, Collins G, Strem D. Synthetic legal intoxicating drugs: the emerging “incense” and “bath salt” phenomenon. *Cleve Clin J Med* 2012;79:258-64.
5. Winstock AR, Barratt MJ. Synthetic cannabis: a comparison of patterns of use and effect profile with natural cannabis in a large global sample. *Drug Alcohol Depend* 2013;131:106-11.
6. Centers for Disease Control and Prevention (CDC). Acute kidney injury associated with synthetic cannabinoid use — multiple states. *MMWR Morb Mortal Wkly Rep* 2013;62:93-8.
7. Marijuana (*Cannabis sativa* L) and Synthetic Cannabinoids. In: Barceloux DG, editor. *Medical toxicology of drug abuse: synthesized chemicals and psychoactive plants*. Hoboken (NJ): John Wiley & Sons Inc.; 2012:886-932.
